# Supplementary material for: Robot in the Loop: An Ethnography-Based Approach to Robotics and Reinforcement Learning to Support On-Site Construction Work
Source: Research Square preprint supplement (doi:10.21203/rs.3.rs-4509610/v1), 2024-07-08
Supplement: Supplementary file 1 [file fe7d0ffc2b450c01b8136355.pdf]

# Robot in the Loop: An Ethnography-Based Approach to Robotics and Reinforcement Learning to Support On-Site Construction Work

Yuning Wu<sup>1</sup>, Emek Erdolu<sup>1</sup>, Jiaying Wei<sup>1</sup>, Jean Oh<sup>2</sup>,  
Daniel Cardoso Llach<sup>1\*</sup>

<sup>1\*</sup>Computational Design Laboratory, School of Architecture, Carnegie Mellon University, 5000 Forbes Ave, Pittsburgh, PA, 15213, USA.

<sup>2</sup>Robotics Institute, Carnegie Mellon University, 5000 Forbes Ave, Pittsburgh, PA, 15213, USA.

\*Corresponding author(s). E-mail(s): [dcardoso@andrew.cmu.edu](mailto:dcardoso@andrew.cmu.edu);  
Contributing authors: [yuningw@andrew.cmu.edu](mailto:yuningw@andrew.cmu.edu);  
[eerdolu@andrew.cmu.edu](mailto:eerdolu@andrew.cmu.edu); [jwei3@andrew.cmu.edu](mailto:jwei3@andrew.cmu.edu);  
[hyaejino@andrew.cmu.edu](mailto:hyaejino@andrew.cmu.edu);

## Abstract

Construction is one of the world’s largest and least automated industries, relying on the cooperation of multiple people with diverse skillsets in labor intensive, physical tasks. Since the 1980s, attempts to introduce robots into construction contexts have mostly focused on automating discrete tasks or monitoring site activities. In this paper, by contrast, we show how robots might be designed to adaptively support the cooperative work of construction teams. Following an indicative review of the state of the art in construction robotics, the paper shows how a detailed ethnographic study of construction workers shaped the design, development, and evaluation of a robot able to assist a team of carpentry workers by delivering tools and hardware during the installation of formwork panels. The resulting prototype is a building companion rover guided by state-of-the-art deep reinforcement learning (DRL) methods and an innovative social navigation stack. Through quantitative and qualitative evaluations in both lab settings and in a construction site, we show how the rover can support carpentry workers taking their specific workflow into account. By documenting these technical and conceptual contributions, we hope to bring ”robotically-supported construction” into focus as a domain of interest for the construction robotics community.

**Keywords:** Construction Robotics, Human-Robot Interaction, Reinforcement Learning, Ethnographic Study

## Declarations

**Competing Interests:** The authors have no competing interests to declare that are relevant to the content of this article.

**Funding:** This work received support from the Commonwealth of Pennsylvania through its PA Department of Community and Economic Development, and the Manufacturing Futures Institute at Carnegie Mellon University. An A+MI Award from Google and a gift from Autodesk to the corresponding author provided additional support.

**Manuscript Type:** Original Research

**Data Availability Statement:** Access to the ethnographic data that support the findings of this study is limited by Carnegie Mellon University’s Office of Research Integrity and Compliance (ORIC). However, an anonymized dataset recording the authors’ observations of construction tasks can be made available by the authors upon reasonable request and with the permission of CMU’s Office of Research Integrity and Compliance (ORIC). In addition, a dataset created during the evaluation of the robotically-supported workflows can be made available by the authors upon reasonable request.

**Acknowledgments:** The authors gratefully acknowledge John Robinson at PJ Dick, and Brian Gaudio and Ankur Dobriyal at Module, for many fruitful conversations as well as essential facilitation and support; Rod Heiple, Sandra DeVicente Wolf, Gary Fedder, and the entire Manufacturing Futures Institute community at CMU for creating a collegiate climate of interdisciplinary research that crucially supported our research; school of architecture head Omar Khan for encouragement and support; and all the students in the Rethinking Automation in Construction seminar at Carnegie Mellon University for enthusiastically engaging with the questions motivating this project.
